# Supplementary material
Source: publisher figshare collection journal article supplement (https://acs.figshare.com/ndownloader/files/5834589)
Supplement: Supplementary file 1 [file 5834589]

data_dhw

_audit_creation_method            SHELXL
_chemical_name_systematic
;
  ?
;
_chemical_name_common             ?
_chemical_formula_moiety          ?
_chemical_formula_structural      ?
_chemical_formula_analytical      ?
_chemical_formula_sum             'C22 H38 O7'
_chemical_formula_weight          414.52
_chemical_melting_point           ?
_chemical_compound_source         ?

loop_
  _atom_type_symbol
  _atom_type_description
  _atom_type_scat_dispersion_real
  _atom_type_scat_dispersion_imag
  _atom_type_scat_source
  'C'  'C'   0.0181   0.0091
  'International Tables Vol C Tables 4.2.6.8 and 6.1.1.4'
  'H'  'H'   0.0000   0.0000
  'International Tables Vol C Tables 4.2.6.8 and 6.1.1.4'
  'O'  'O'   0.0492   0.0322
  'International Tables Vol C Tables 4.2.6.8 and 6.1.1.4'

_symmetry_cell_setting            Orthorhombic
_symmetry_space_group_name_H-M    P2(1)2(1)2(1)

loop_
  _symmetry_equiv_pos_as_xyz
  'x, y, z'
  '-x+1/2, -y, z+1/2'
  '-x, y+1/2, -z+1/2'
  'x+1/2, -y+1/2, -z'

_cell_length_a                    9.322(2)
_cell_length_b                    9.454(2)
_cell_length_c                    27.584(4)
_cell_angle_alpha                 90.00
_cell_angle_beta                  90.00
_cell_angle_gamma                 90.00
_cell_volume                      2431.0(8)
_cell_formula_units_Z             4
_cell_measurement_temperature     293(2)
_cell_measurement_reflns_used     25
_cell_measurement_theta_min       30
_cell_measurement_theta_max       45

_exptl_crystal_description        ?
_exptl_crystal_colour             ?
_exptl_crystal_size_max           0.3
_exptl_crystal_size_mid           0.2
_exptl_crystal_size_min           0.1
_exptl_crystal_density_meas       'not measure'
_exptl_crystal_density_diffrn     1.133
_exptl_crystal_density_method     ?
_exptl_crystal_F_000              904
_exptl_absorpt_coefficient_mu     0.680
_exptl_absorpt_correction_type    none
_exptl_absorpt_correction_T_min   ?
_exptl_absorpt_correction_T_max   ?

_exptl_special_details
;
  ?
;

_diffrn_ambient_temperature       293(2)
_diffrn_radiation_wavelength      1.54178
_diffrn_radiation_type            CuK\a
_diffrn_radiation_source          'fine-focus sealed tube'
_diffrn_radiation_monochromator   graphite
_diffrn_measurement_device        'Siemens R3m/V diffractometer'
_diffrn_measurement_method        \w/2\q
_diffrn_standards_number          3
_diffrn_standards_interval_count  97
_diffrn_standards_interval_time   ?
_diffrn_standards_decay_%         none
_diffrn_reflns_number             2176
_diffrn_reflns_av_R_equivalents   0.0353
_diffrn_reflns_av_sigmaI/netI     0.0453
_diffrn_reflns_limit_h_min        -1
_diffrn_reflns_limit_h_max        10
_diffrn_reflns_limit_k_min        0
_diffrn_reflns_limit_k_max        10
_diffrn_reflns_limit_l_min        0
_diffrn_reflns_limit_l_max        30
_diffrn_reflns_theta_min          3.20
_diffrn_reflns_theta_max          57.04
_reflns_number_total              2137
_reflns_number_observed           1650
_reflns_observed_criterion        >2sigma(I)

_computing_data_collection        'Siemens P3'
_computing_cell_refinement        'Siemens P3'
_computing_data_reduction         'Siemens XDISK'
_computing_structure_solution     'SHELXS-86 (Sheldrick, 1990)'
_computing_structure_refinement   'SHELXL-93 (Sheldrick, 1993)'
_computing_molecular_graphics     'Siemens XP'
_computing_publication_material   'CIFTAB'

_refine_special_details
;
  Refinement on F^2^ for ALL reflections except for 1 with very negative F^2^
  or flagged by the user for potential systematic errors.  Weighted R-factors
  wR and all goodnesses of fit S are based on F^2^, conventional R-factors R
  are based on F, with F set to zero for negative F^2^. The observed criterion
  of F^2^ > 2sigma(F^2^) is used only for calculating _R_factor_obs etc. and is
  not relevant to the choice of reflections for refinement.  R-factors based
  on F^2^ are statistically about twice as large as those based on F, and R-
  factors based on ALL data will be even larger.
;

_refine_ls_structure_factor_coef  Fsqd
_refine_ls_matrix_type            full
_refine_ls_weighting_scheme
  'calc w=1/[\s^2^(Fo^2^)+(0.0745P)^2^+0.6248P] where P=(Fo^2^+2Fc^2^)/3'
_atom_sites_solution_primary      direct
_atom_sites_solution_secondary    difmap
_atom_sites_solution_hydrogens    geom
_refine_ls_hydrogen_treatment     riding
_refine_ls_extinction_method      SHELXL
_refine_ls_extinction_coef        0.0030(4)
_refine_ls_extinction_expression
  'Fc^*^=kFc[1+0.001xFc^2^\l^3^/sin(2\q)]^-1/4^'
_refine_ls_abs_structure_details
  'Flack H D (1983), Acta Cryst. A39, 876-881'
_refine_ls_abs_structure_Flack    0.31(55)
_refine_ls_number_reflns          2136
_refine_ls_number_parameters      287
_refine_ls_number_restraints      0
_refine_ls_R_factor_all           0.0742
_refine_ls_R_factor_obs           0.0540
_refine_ls_wR_factor_all          0.1493
_refine_ls_wR_factor_obs          0.1332
_refine_ls_goodness_of_fit_all    1.042
_refine_ls_goodness_of_fit_obs    1.082
_refine_ls_restrained_S_all       1.044
_refine_ls_restrained_S_obs       1.082
_refine_ls_shift/esd_max          2.293
_refine_ls_shift/esd_mean         0.153

loop_
  _atom_site_label
  _atom_site_type_symbol
  _atom_site_fract_x
  _atom_site_fract_y
  _atom_site_fract_z
  _atom_site_U_iso_or_equiv
  _atom_site_thermal_displace_type
  _atom_site_occupancy
  _atom_site_calc_flag
  _atom_site_refinement_flags
  _atom_site_disorder_group
O1 O 0.9484(4) 0.7772(4) 0.23910(13) 0.0726(11) Uani 1 d . .
C1 C 0.9268(5) 0.7856(6) 0.1965(2) 0.0572(13) Uani 1 d . .
O2 O 0.9825(4) 0.8840(4) 0.16801(13) 0.0778(12) Uani 1 d . .
H2 H 1.0319(4) 0.9380(4) 0.18423(13) 0.117 Uiso 1 calc R .
C2 C 0.8354(5) 0.6861(6) 0.1670(2) 0.0565(14) Uani 1 d . .
H2A H 0.7919(23) 0.7380(27) 0.1390(14) 0.068 Uiso 1 calc R .
O3 O 0.7243(3) 0.6353(4) 0.19857(11) 0.0532(9) Uani 1 d . .
C3 C 0.9245(6) 0.5639(7) 0.1486(2) 0.078(2) Uani 1 d . .
H3A H 0.9691(20) 0.5181(20) 0.1753(11) 0.094 Uiso 1 calc R .
H3B H 0.9978(32) 0.5990(15) 0.1280(8) 0.094 Uiso 1 calc R .
O4 O 0.5578(4) 0.6258(3) 0.13587(11) 0.0542(9) Uani 1 d . .
C4 C 0.8343(7) 0.4572(8) 0.1209(2) 0.079(2) Uani 1 d . .
H4 H 0.9053(35) 0.3479(53) 0.1165(3) 0.095 Uiso 1 calc R .
O5 O 0.1730(5) 1.0603(5) 0.20202(13) 0.0907(15) Uani 1 d . .
H5 H 0.1392(5) 0.9897(5) 0.18908(13) 0.136 Uiso 1 calc R .
C5 C 0.7005(7) 0.4221(6) 0.1506(2) 0.075(2) Uani 1 d . .
H5A H 0.6347(27) 0.3738(20) 0.1301(8) 0.090 Uiso 1 calc R .
H5B H 0.7274(12) 0.3584(26) 0.1757(10) 0.090 Uiso 1 calc R .
O6 O 0.5625(4) 0.8883(4) 0.08815(11) 0.0608(10) Uani 1 d . .
C6 C 0.6230(6) 0.5463(6) 0.1735(2) 0.0570(14) Uani 1 d . .
O7 O 0.5397(5) 0.7905(5) 0.01421(13) 0.0882(14) Uani 1 d . .
C7 C 0.5145(6) 0.4999(6) 0.2106(2) 0.0613(15) Uani 1 d . .
H7A H 0.5681(18) 0.4581(16) 0.2399(10) 0.074 Uiso 1 calc R .
H7B H 0.4529(20) 0.4204(27) 0.1958(5) 0.074 Uiso 1 calc R .
C8 C 0.4149(6) 0.6171(6) 0.2285(2) 0.0598(14) Uani 1 d . .
H8 H 0.4743(30) 0.6863(36) 0.2492(11) 0.072 Uiso 1 calc R .
C9 C 0.3553(6) 0.6985(6) 0.1847(2) 0.0588(15) Uani 1 d . .
H9A H 0.2895(25) 0.6372(22) 0.1663(7) 0.071 Uiso 1 calc R .
H9B H 0.3009(21) 0.7814(30) 0.1961(4) 0.071 Uiso 1 calc R .
C10 C 0.4760(5) 0.7460(5) 0.1523(2) 0.0492(12) Uani 1 d . .
H10 H 0.5400(32) 0.8083(31) 0.1712(9) 0.059 Uiso 1 calc R .
C11 C 0.4312(5) 0.8234(5) 0.1063(2) 0.0524(13) Uani 1 d . .
H11 H 0.3988(17) 0.7559(34) 0.0833(11) 0.063 Uiso 1 calc R .
C12 C 0.3158(6) 0.9357(6) 0.1126(2) 0.0579(15) Uani 1 d . .
H12 H 0.2404(46) 0.8941(25) 0.1282(9) 0.069 Uiso 1 calc R .
C13 C 0.3652(6) 1.0596(6) 0.1438(2) 0.066(2) Uani 1 d . .
H13A H 0.4260(23) 1.0240(14) 0.1690(9) 0.079 Uiso 1 calc R .
H13B H 0.4216(22) 1.1219(23) 0.1241(7) 0.079 Uiso 1 calc R .
C14 C 0.2459(7) 1.1435(6) 0.1666(2) 0.075(2) Uani 1 d . .
H14A H 0.2870(15) 1.2319(34) 0.1825(6) 0.089 Uiso 1 calc R .
H14B H 0.1752(26) 1.1746(14) 0.1405(10) 0.089 Uiso 1 calc R .
C15 C 0.7980(8) 0.5114(9) 0.0700(2) 0.105(3) Uani 1 d . .
H15A H 0.7386(8) 0.4434(9) 0.0537(2) 0.158 Uiso 1 calc R .
H15B H 0.8850(8) 0.5249(9) 0.0519(2) 0.158 Uiso 1 calc R .
H15C H 0.7477(8) 0.5997(9) 0.0724(2) 0.158 Uiso 1 calc R .
C16 C 0.2922(6) 0.5586(7) 0.2599(2) 0.081(2) Uani 1 d . .
H16A H 0.2332(6) 0.6353(7) 0.2709(2) 0.121 Uiso 1 calc R .
H16B H 0.3316(6) 0.5097(7) 0.2873(2) 0.121 Uiso 1 calc R .
H16C H 0.2354(6) 0.4943(7) 0.2410(2) 0.121 Uiso 1 calc R .
C17 C 0.2606(8) 0.9875(8) 0.0632(2) 0.085(2) Uani 1 d . .
H17A H 0.1893(8) 1.0595(8) 0.0681(2) 0.128 Uiso 1 calc R .
H17B H 0.2189(8) 0.9097(8) 0.0459(2) 0.128 Uiso 1 calc R .
H17C H 0.3389(8) 1.0258(8) 0.0449(2) 0.128 Uiso 1 calc R .
C18 C 0.6059(7) 0.8600(7) 0.0426(2) 0.070(2) Uani 1 d . .
C19 C 0.7505(7) 0.9250(9) 0.0320(2) 0.097(3) Uani 1 d . .
H19A H 0.7798(16) 0.9819(28) 0.0601(13) 0.116 Uiso 1 calc R .
H19B H 0.8209(33) 0.8486(35) 0.0282(3) 0.116 Uiso 1 calc R .
C20 C 0.7555(10) 1.0151(10) -0.0115(4) 0.114(3) Uani 1 d . .
H20 H 0.7148(30) 0.9629(47) -0.0409(23) 0.137 Uiso 1 calc R 1
C21A C 0.6597(38) 1.1395(33) 0.0024(21) 0.332(34) Uani 0.57(7) d P 1
H21A H 0.6580(38) 1.2070(33) -0.0236(21) 0.497 Uiso 0.50 calc PR 1
H21B H 0.6967(38) 1.1837(33) 0.0312(21) 0.497 Uiso 0.50 calc PR 1
H21C H 0.5641(38) 1.1061(33) 0.0085(21) 0.497 Uiso 0.50 calc PR 1
C21B C 0.6635(32) 1.1124(47) -0.0256(19) 0.181(24) Uani 0.43(7) d P 2
H21D H 0.6956(32) 1.1536(47) -0.0555(19) 0.272 Uiso 0.50 calc PR 2
H21E H 0.6568(32) 1.1846(47) -0.0012(19) 0.272 Uiso 0.50 calc PR 2
H21F H 0.5710(32) 1.0699(47) -0.0303(19) 0.272 Uiso 0.50 calc PR 2
C22 C 0.9041(9) 1.0685(11) -0.0218(4) 0.169(5) Uani 1 d . .
H22A H 0.9716(9) 0.9925(11) -0.0183(4) 0.253 Uiso 1 calc R .
H22B H 0.9275(9) 1.1428(11) 0.0006(4) 0.253 Uiso 1 calc R .
H22C H 0.9084(9) 1.1044(11) -0.0544(4) 0.253 Uiso 1 calc R .

loop_
  _atom_site_aniso_label
  _atom_site_aniso_U_11
  _atom_site_aniso_U_22
  _atom_site_aniso_U_33
  _atom_site_aniso_U_23
  _atom_site_aniso_U_13
  _atom_site_aniso_U_12
O1 0.065(2) 0.090(3) 0.064(2) 0.002(2) -0.011(2) -0.008(2)
C1 0.036(3) 0.068(3) 0.068(3) -0.004(3) 0.005(3) 0.000(3)
O2 0.070(3) 0.093(3) 0.071(2) 0.003(2) 0.006(2) -0.029(3)
C2 0.042(3) 0.072(3) 0.056(3) -0.003(3) 0.008(3) -0.006(3)
O3 0.043(2) 0.064(2) 0.053(2) 0.001(2) -0.004(2) -0.006(2)
C3 0.047(3) 0.100(5) 0.088(4) -0.016(4) 0.000(3) 0.008(4)
O4 0.053(2) 0.058(2) 0.052(2) -0.003(2) -0.004(2) -0.001(2)
C4 0.068(4) 0.089(4) 0.081(4) -0.017(4) -0.004(4) 0.012(4)
O5 0.107(3) 0.090(3) 0.075(2) -0.027(2) 0.020(3) -0.037(3)
C5 0.081(4) 0.055(3) 0.090(4) -0.003(3) -0.008(4) 0.001(4)
O6 0.048(2) 0.078(2) 0.057(2) 0.003(2) 0.005(2) -0.014(2)
C6 0.058(3) 0.049(3) 0.064(3) 0.005(3) -0.006(3) -0.004(3)
O7 0.093(3) 0.111(3) 0.061(2) -0.010(2) 0.011(2) -0.013(3)
C7 0.057(3) 0.054(3) 0.073(3) 0.013(3) -0.007(3) -0.009(3)
C8 0.050(3) 0.070(3) 0.059(3) 0.013(3) 0.006(3) -0.010(3)
C9 0.049(3) 0.065(3) 0.063(3) 0.016(3) -0.003(3) -0.008(3)
C10 0.043(3) 0.052(3) 0.053(3) 0.003(2) -0.004(2) -0.007(3)
C11 0.048(3) 0.056(3) 0.053(3) 0.001(2) 0.004(3) -0.013(3)
C12 0.059(3) 0.065(3) 0.050(3) 0.003(3) -0.002(3) -0.002(3)
C13 0.062(4) 0.062(3) 0.074(3) 0.001(3) 0.006(3) 0.000(3)
C14 0.081(4) 0.065(4) 0.078(4) -0.002(3) 0.014(4) -0.011(4)
C15 0.100(6) 0.136(7) 0.080(4) -0.030(4) -0.003(4) 0.018(6)
C16 0.058(4) 0.103(4) 0.082(4) 0.035(4) 0.007(3) -0.011(4)
C17 0.088(5) 0.106(5) 0.062(3) 0.008(3) -0.008(4) 0.022(5)
C18 0.066(4) 0.091(4) 0.053(3) 0.004(3) 0.002(3) 0.002(4)
C19 0.057(4) 0.151(7) 0.083(4) 0.018(5) 0.017(4) -0.009(5)
C20 0.081(5) 0.102(6) 0.159(8) 0.031(6) 0.012(6) -0.013(5)
C21A 0.259(40) 0.106(16) 0.631(83) -0.026(31) 0.262(52) 0.031(21)
C21B 0.085(19) 0.194(37) 0.264(45) 0.159(30) -0.087(23) -0.085(21)
C22 0.106(7) 0.153(8) 0.246(12) 0.081(9) 0.051(8) -0.013(7)

_geom_special_details
;
  All esds (except the esd in the dihedral angle between two l.s. planes)
  are estimated using the full covariance matrix.  The cell esds are taken
  into account individually in the estimation of esds in distances, angles
  and torsion angles; correlations between esds in cell parameters are only
  used when they are defined by crystal symmetry.  An approximate (isotropic)
  treatment of cell esds is used for estimating esds involving l.s. planes.
;

loop_
  _geom_bond_atom_site_label_1
  _geom_bond_atom_site_label_2
  _geom_bond_distance
  _geom_bond_site_symmetry_2
  _geom_bond_publ_flag
O1 C1 1.194(6) . ?
C1 O2 1.324(6) . ?
C1 C2 1.508(7) . ?
C2 O3 1.435(5) . ?
C2 C3 1.511(7) . ?
O3 C6 1.441(6) . ?
C3 C4 1.519(8) . ?
O4 C6 1.419(6) . ?
O4 C10 1.442(5) . ?
C4 C5 1.528(9) . ?
C4 C15 1.534(8) . ?
O5 C14 1.427(6) . ?
C5 C6 1.517(7) . ?
O6 C18 1.346(6) . ?
O6 C11 1.458(5) . ?
C6 C7 1.503(7) . ?
O7 C18 1.195(6) . ?
C7 C8 1.528(7) . ?
C8 C9 1.535(6) . ?
C8 C16 1.538(7) . ?
C9 C10 1.505(7) . ?
C10 C11 1.525(6) . ?
C11 C12 1.521(7) . ?
C12 C13 1.524(7) . ?
C12 C17 1.537(7) . ?
C13 C14 1.504(8) . ?
C18 C19 1.510(9) . ?
C19 C20 1.473(11) . ?
C20 C21B 1.32(4) . ?
C20 C22 1.502(11) . ?
C20 C21A 1.53(3) . ?

loop_
  _geom_angle_atom_site_label_1
  _geom_angle_atom_site_label_2
  _geom_angle_atom_site_label_3
  _geom_angle
  _geom_angle_site_symmetry_1
  _geom_angle_site_symmetry_3
  _geom_angle_publ_flag
O1 C1 O2 124.4(5) . . ?
O1 C1 C2 125.8(5) . . ?
O2 C1 C2 109.8(4) . . ?
O3 C2 C1 106.8(4) . . ?
O3 C2 C3 110.2(5) . . ?
C1 C2 C3 110.4(4) . . ?
C2 O3 C6 112.2(3) . . ?
C2 C3 C4 111.8(5) . . ?
C6 O4 C10 114.4(3) . . ?
C3 C4 C5 109.1(5) . . ?
C3 C4 C15 111.2(6) . . ?
C5 C4 C15 112.6(5) . . ?
C6 C5 C4 116.3(5) . . ?
C18 O6 C11 119.3(4) . . ?
O4 C6 O3 108.8(4) . . ?
O4 C6 C7 111.4(4) . . ?
O3 C6 C7 106.6(4) . . ?
O4 C6 C5 108.0(4) . . ?
O3 C6 C5 109.8(5) . . ?
C7 C6 C5 112.2(5) . . ?
C6 C7 C8 114.6(4) . . ?
C7 C8 C9 109.2(4) . . ?
C7 C8 C16 111.9(5) . . ?
C9 C8 C16 110.7(4) . . ?
C10 C9 C8 110.2(4) . . ?
O4 C10 C9 110.3(4) . . ?
O4 C10 C11 105.1(4) . . ?
C9 C10 C11 115.6(4) . . ?
O6 C11 C12 109.8(4) . . ?
O6 C11 C10 104.9(4) . . ?
C12 C11 C10 115.7(4) . . ?
C11 C12 C13 112.8(4) . . ?
C11 C12 C17 111.0(4) . . ?
C13 C12 C17 110.9(5) . . ?
C14 C13 C12 114.7(5) . . ?
O5 C14 C13 110.4(5) . . ?
O7 C18 O6 124.5(5) . . ?
O7 C18 C19 123.9(6) . . ?
O6 C18 C19 111.6(6) . . ?
C20 C19 C18 114.9(6) . . ?
C21B C20 C19 128.6(23) . . ?
C21B C20 C22 108.1(14) . . ?
C19 C20 C22 112.1(8) . . ?
C19 C20 C21A 102.8(21) . . ?
C22 C20 C21A 109.2(14) . . ?

_refine_diff_density_max    0.208
_refine_diff_density_min   -0.140
_refine_diff_density_rms    0.037

#===END
